# Supplementary material
Source: Springer Nature journal article supplement (https://www.springermedizin.de/resource/supplementary/12931_2013_1496_MOESM12_ESM.docx/9426296)
Supplement: MOESM12 [file 9426296]

| **Group**  **Table 1: *L. rhamnosus* and budesonide treatment reduce the lung resistance in chronically asthmatic mice** |  | | **Methacholine**  **(mg/mL)** | |  |  | | |  | |  |  | | |  |  |
| --- | --- | --- | --- | --- | --- | --- | --- | --- | --- | --- | --- | --- | --- | --- | --- | --- |
| **basal**  mean SEM | | **0**  **(saline)**  mean SEM | **0.38 0.75 1.56**  mean SEM mean SEM mean SEM | | | **3.13 6.25**  mean SEM mean SEM | | **12.5**  mean SEM | **25**  mean SEM | | |  |  |
| **OVA/Sal-PBS** |  | **0.73 0.09** | | **0.76 0.09 0.80 0.06** | | | **0.88 0.06** | **0.97 0.08 1.04 0.09 1.16 0.06** | | **1.23 0.07 1.41 0.12** | | |  |  | | | |  |
| **OVA/OVA-PBS** |  | **1.81# 0.31** | | **1.79# 0.22 1.76# 0.19** | | | **1.85# 0.20** | **1.86# 0.21 1.82# 0.19 1.73# 0.15** | | **1.96# 0.18 2.01# 0.21** | | |  |  | | | |  |
| **OVA/Sal-*B. breve*** |  | **0.61 0.09** | | **0.76 0.15 0.93 0.21** | | | **0.96 0.17** | **0.97 0.13 1.00 0.07 1.12 0.09** | | **1.17 0.09 1.16 0.06** | | |  |  | | | |  |
| **OVA/OVA-*B. breve*** |  | **1.74 0.58** | | **1.66¤  0.59 1.54 0.43** | | | **1.55 0.33** | **1.66 0.28 1.86 0.30 1.97 0.27** | | **2.18 0.29 2.36 0.30** | | |  |  | | | |  |
| **OVA/Sal-*L. rhamnosus*** |  | **0.64 0.09** | | **0.73# 0.16 0.74 0.09** | | | **0.81 0.11** | **0.83 0.08 0.93 0.08 1.02 0.10** | | **1.05 0.08 1.20 0.12** | | |  |  | | | |  |
| **OVA/OVA-*L. rhamnosus*** |  | **1.05¤  0.18** | | **1.15¤ 0.14 1.13 0.13** | | | **1.18¤ 0.13** | **1.30¤  0.12 1.48 0.13 1.55 0.14** | | **1.69 0.16 1.80 0.16** | | |  |  | | | |  |
| **OVA/Sal-BUD** |  | **0.55 0.02** | | **0.56# 0.02 0.63 0.04** | | | **0.71 0.07** | **0.79 0.09 0.85 0.10 0.96 0.09** | | **1.08 0.12 1.17 0.11** | | |  |  | | | |  |
| **OVA/OVA-BUD** |  | **0.85¤ 0.12** | | **0.88¤ 0.09 1.01¤ 0.09** | | | **1.10¤ 0.09** | **1.23¤ 0.13 1.38 0.13 1.57 0.15** | | **1.73 0.10 1.80 0.16** | | |  |  | | | |  |
